# Supplementary material
Source: PubMed Central journal article supplement (PMC3171956)
Supplement: supp_WNL.0b013e31822dc7a5_Appendix_e-1.pdf [file supp_WNL.0b013e31822dc7a5_Appendix_e-1.pdf]

## **Supplementary Analyses of various historical placebo controls**

### **Control Groups**

We used our database of placebo patients from previous clinical trials as controls for lithium patients in this study. Our database contains repeated ALSFRS-R scores from six completed clinical trials: NEALS creatine, NEALS celebrex, NEALS lithium, Novartis TCH436, QALS trial of CoQ10, and WALs minocycline. Table 1 summarizes numbers of placebo patients and their characteristics.

The trials in Table 1 were conducted over a 9 year period and showed no evidence of change in FRS-R slope (our primary outcome measure) over time. Patient entry characteristics were similar except for restricted entry for the TCH346 and minocycline trials that enrolled patients with FVC minimum of 75% and symptom duration 3 years or less. Both of these trials had a 4 month lead-in where none of the patients received the study drug and were then randomized. In the minocycline trial 45 patients dropped out during the lead-in but their data were included. In the TCH346 trial we only have data for those randomized at 4 months. This could explain the lower estimated slope for TCH346 placebo since those with rapidly declining FRS-R scores may have been more likely to drop out prior to randomization. Slope comparisons in Table 1 are based on fitting a linear mixed effect model to each dataset independently and are based on 6 months followup. This was done to make the slopes comparable since two of the studies had only 6 months of followup for most patients.

We found no significant differences in FRS-R slopes among the different placebo groups ( $p=0.53$ , based on comparing chi-squares from separate fits with that from a pooled fit). However, previous work using this database showed that slopes are influenced by initial FVC and symptom duration. Thus, our primary comparison control consisted of placebo patients from the minocycline trial since the lithium phase II trial had the same entry criteria and was conducted at many of the same sites as the minocycline trial.

### **Results of Lithium vs Placebo Comparisons**

We were fortunate to obtain data from a recent placebo-controlled clinical trial of lithium conducted by the NEALS group [1]. This trial was stopped after the first interim analysis for futility. Patient characteristics and ALSFRS-R slopes over the first six months of followup for the two arms of this trial are included in Table 1. It is interesting to note that ALSFRS-R slopes for the NEALS lithium placebo arm is similar to those from other placebo groups and that the slopes for the two lithium treated groups are similar ( $p=0.66$  for testing slope difference between the two lithium groups after fitting with a linear mixed effect model).

Results of comparing the WALs lithium patients with different placebo groups are summarized in Table 2 and are based on fitting all follow-up data (not just the first 6 months as in Table 1). The estimates for the comparisons shown in Table 2 are based on

a model with an additional quadratic term for follow-up time since slopes increase over time and the quadratic term for time becomes significant when follow-up is longer than 6 months. Thus slopes reported in Table 2 are not directly comparable to those in Table 1.

Since we found no statistical difference between the ALSFRS-R slopes of WALs and NEALS lithium groups, their data were combined and compared to the pooled placebo patients from all studies. The results are in agreement with those using the WALs data alone (line 4 vs line 2 of Table 2).

We also compared results from the WALs lithium study with each placebo group from our database. We matched patients' entry criteria to that of the WALs minocycline and lithium trials (Table 3). These comparisons suggest that rates of decline of ALSFRS-R for lithium-taking patients was worse than those for the subset of comparable placebo patients in each other trial, except for patients in the NEALS creatine trial, where the slope was unusually high compared to the other placebo trial subgroups.

**Table e-1: Comparison of Placebo and Lithium Trials Subgroups\***

| Trial                               | Placebo           |                   |                    |                                  |                                  |                  |                | Lithium          |                 |
|-------------------------------------|-------------------|-------------------|--------------------|----------------------------------|----------------------------------|------------------|----------------|------------------|-----------------|
|                                     | NEALS<br>creatine | NEALS<br>celebrex | Novartis<br>TCH346 | WALS<br>Minocycline <sup>1</sup> | Columbia<br>multicenter<br>CoQ10 | NEALS<br>Lithium | All Placebo    | NEALS<br>Lithium | WALS<br>Lithium |
| Years                               | 2000-02           | 2001-03           | 2004               | 2005-07                          | 2005-07                          | 2009             | 2000-2009      | 2009             | 2009            |
| N patients*                         | 45                | 95                | 108                | 249                              | 75                               | 44               | 616            | 39               | 107             |
| Trial duration                      | 6 mos             | 12 mos            | 10 mos             | 13 mos                           | 9 mos                            | 6 mos            | 6 - 13 mos     | 6 mos            | 13 mos          |
| Symptom<br>duration (yrs)           | 0.6 - 4.8         | 0.4 - 5.1         | 0.3 - 3.0          | 0.2 - 3.8                        | 0.5 - 5.5                        | 0.5 - 3.0        | 0.2 - 5.5      | 0.6 - 2.9        | 0.2 - 3.3       |
| Entry FVC<br>median                 | 82.9              | 83.5              | 88.5               | 91.0                             | 90.0                             | 87.5             | 89.0           | 93               | 91              |
| Entry FVC<br>range                  | 47 - 134          | 57 - 146          | 39 - 147           | 72 - 178                         | 61 - 128                         | 56 - 134         | 39 - 178       | 59 - 135         | 73 - 133        |
| Entry FRS-R<br>median               | 38                | 40                | 40                 | 39                               | 36                               | 37               | 39             | 40               | 38              |
| Entry FRS-R<br>range                | 18 - 47           | 22 - 47           | 26 - 47            | 23 - 48                          | 27 - 43                          | 24 - 48          | 18 - 48        | 27 - 45          | 18 - 47         |
| Est. FRS-R<br>Slope/mo <sup>2</sup> | -0.98             | -1.06             | -0.79              | -0.94                            | -0.82                            | -1.00            | -0.89          | -1.29            | -1.21           |
| Slope 5th, 95th<br>percentile       | -2.50<br>-0.14    | -2.49<br>-0.12    | -2.66<br>+0.03     | -2.52<br>+0.00                   | -1.75<br>-0.16                   | -2.69<br>+0.25   | -2.45<br>+0.01 | -3.90<br>-0.03   | -3.14<br>-0.24  |

\*Patients with 2 or more assessments

<sup>1</sup>Includes nonrandomized patients

<sup>2</sup>Slopes estimated from linear mixed effects model applied to first 6 months of follow-up; separate estimation for each data subset without reference to other studies.

**Table e-2: Lithium comparisons with controls\***

| Controls                            | Restrictions                          | Total<br>N | N<br>Lith | N<br>Cont | Controls           |           | Lithium | Lithium Effect  |            |         |
|-------------------------------------|---------------------------------------|------------|-----------|-----------|--------------------|-----------|---------|-----------------|------------|---------|
|                                     |                                       |            |           |           | Slope <sup>1</sup> | 95% CI    | Slope   | Slope<br>change | 95% CI     | p-value |
| WALS Lithium vs.<br>Mino controls   | >1 visit                              | 356        | 107       | 249       | 0.87               | 0.75-0.99 | 1.06    | 0.19            | 0.01-0.37  | 0.048   |
| WALS Lithium vs.<br>Mino controls   | >1 visit,<br>FVC≥75%,<br>sympdur≤3yrs | 337        | 98        | 239       | 0.84               | 0.73-0.97 | 1.02    | 0.17            | -0.01-0.36 | 0.069   |
| WALS Lithium vs.<br>All Placebo     | >1 visit,<br>FVC≥75%,<br>sympdur≤3yrs | 573        | 98        | 475       | 0.80               | 0.71-0.88 | 0.99    | 0.19            | 0.03-0.36  | 0.023   |
| Combined Lithium<br>vs. All Placebo | >1 visit,<br>FVC≥75%,<br>sympdur≤3yrs | 605        | 130       | 475       | 0.80               | 0.71-0.88 | 0.98    | 0.18            | 0.03-0.39  | 0.022   |

\*Comparisons based on fitting a linear mixed effects model to combined placebo and lithium data.

<sup>1</sup>Slopes are linear component estimates from a linear mixed effects model with an additional quadratic term to model increasing slope over time and are based on 13 months of follow-up. Slopes are shown as positive numbers and are estimated rates of decline per month from the linear mixed effects analysis.

**Table e-3: Comparison of ALSFRS-R slope for each placebo historical control with lithium for patients with initial FVC≥75 and symptom duration ≤ 2 yrs.**

| Placebo Grp   | Placebo |               | Lithium (Mean) |       | Baseline features (means) |                              |          |
|---------------|---------|---------------|----------------|-------|---------------------------|------------------------------|----------|
|               | N       | Slope<br>Mean | Difference*    | P-val | FVC                       | Symptom<br>Duration<br>(yrs) | ALSFRS-R |
| WALS mino     | 239     | 0.92          | 0.21           | 0.05  | 94.4                      | 1.4                          | 38.1     |
| NEALS celb    | 55      | 1.23          | -0.11          | 0.50  | 90.6                      | 1.3                          | 40.9     |
| NEALS crea    | 25      | 0.94          | 0.20           | 0.35  | 92.7                      | 1.6                          | 39.3     |
| QALS CoQ10    | 46      | 0.87          | 0.28           | 0.07  | 100.0                     | 1.6                          | 36.6     |
| NEALS lithium | 31      | 0.95          | 0.20           | 0.35  | 95.6                      | 1.7                          | 37.9     |
| Combined      | 396     | 0.96          | 0.17           | 0.10  | 94.5                      | 1.5                          | 38.4     |
| WALS lithium  | 98      | 1.15          |                |       | 95.8                      | 1.5                          | 37.4     |

\*Slope mean plus Difference differs for each study due to estimation of random effects, which differ for each study.

**Reference**

1. Aggarwal SP, Zinman L, Simpson E, et al. Safety and efficacy of lithium in combination with riluzole for treatment of amyotrophic lateral sclerosis: a randomised, double-blind, placebo-controlled trial. *Lancet Neurol* 2010;9:481-488.
